# Supplementary material for: A multi-strategy linear discriminant analysis (LDA) method coupled with laser ablation inductively coupled plasma mass spectrometry (LA-ICP-MS) for discriminating the geographical origin of nephrite
Source: Royal Society of Chemistry journal article supplement (doi:10.1039/d2ja00386d), 2023-01-01
Supplement: d2ja00386d1.pdf [file d2ja00386d1.pdf]

Supplementary Table S1

Table S1 LA-ICP-MS chemical composition results with means and standard deviation of seven nephrite localities. The range of element concentration are listed in parenthesis.

| Elements | Mean ± Standard Deviation (ppm) |                              |                              |                              |                              |                               |                              |
|----------|---------------------------------|------------------------------|------------------------------|------------------------------|------------------------------|-------------------------------|------------------------------|
|          | Yutian<br>(n=84)                | Qjemo<br>(n=100)             | Sanchahe<br>(n=40)           | Baikal<br>(n=57)             | Sanwei<br>Mountain<br>(n=98) | Maxian<br>Mountain<br>(n=59)  | Chuncheon<br>(n=10)          |
| Li       | 1.84 ± 1.79<br>(0.15-10.67)     | 2.25 ± 3.10<br>(0-18.48)     | 2.46±1.17<br>(0-5.68)        | 5.84 ± 3.50<br>(1.68-16.77)  | 1.73 ± 0.87<br>(0-5.77)      | 7.68 ± 3.10<br>(2.46-22.87)   | 1.38 ± 1.25<br>(0.31-4.57)   |
| Be       | 21.3 ± 9.2<br>(3.6-47.2)        | 9.9 ± 7.7<br>(1.21-58.74)    | 0.4 ± 0.6<br>(0-2.73)        | 22.9 ± 11.9<br>(2.64-50.80)  | 1.7 ± 1.4<br>(0.15-9.40)     | 19.5 ± 9.0<br>(0.15-54.75)    | 17.4 ± 6.7<br>(1.22-29.31)   |
| Na       | 674 ± 146<br>(397-1089)         | 827 ± 349<br>(567-3977)      | 376 ± 112<br>(211-726)       | 638 ± 125<br>(277-918)       | 974 ± 286<br>(544-1931)      | 857 ± 229<br>(217-1652)       | 277 ± 213<br>(168-907)       |
| Al       | 3487 ± 1512<br>(1621-12836)     | 3403 ± 1478<br>(1856-14498)  | 1102 ± 492<br>(382-2310)     | 3036 ± 594<br>(905-4435)     | 3508 ± 1064<br>(1632-8799)   | 2898 ± 707<br>(822-4869)      | 1760 ± 466<br>(1052-2673)    |
| P        | 143 ± 27<br>(84-246)            | 156 ± 46<br>(0-299)          | 85 ± 74<br>(0-240)           | 130 ± 62<br>(0-262)          | 138 ± 16<br>(78.4-185)       | 72 ± 10<br>(45-118)           | 26 ± 6<br>(18-39)            |
| K        | 1029 ± 2305<br>(50.7-21170)     | 585 ± 577<br>(0-3940)        | 215 ± 84<br>(68-569)         | 565 ± 135<br>(254-1107)      | 420 ± 153<br>(199-1296)      | 513 ± 137<br>(207-824)        | 280 ± 190<br>(108-661)       |
| Sc       | 0.77 ± 0.38<br>(0-3.22)         | 1.81 ± 4.09<br>(0-31.68)     | 1.25 ± 0.58<br>(0.48-3.36)   | 1.68 ± 1.56<br>(0.70-12.79)  | 1.85 ± 1.84<br>(0-17.36)     | 1.52 ± 0.92<br>(0.56-6.55)    | 1.10 ± 0.34<br>(0.85-2.08)   |
| Ti       | 46.3 ± 27.4<br>(6.7-132)        | 76.7 ± 37.7<br>(5.38-292.1)  | 64.5 ± 45.0<br>(4.1-187.3)   | 28.6 ± 22.8<br>(1.06-123.16) | 80.0 ± 47.3<br>(5.32-206.28) | 99.0 ± 34.1<br>(25.39-155.96) | 53.3 ± 49.4<br>(9-164)       |
| V        | 14.9 ± 12.4<br>(1.5-56.5)       | 2.4 ± 6.6<br>(0.56-65.81)    | 7.3 ± 5.4<br>(0.68-23.5)     | 13.3 ± 6.9<br>(5.33-47.36)   | 16.6 ± 12.5<br>(2.17-81.60)  | 20.1 ± 10.2<br>(3.52-61.89)   | 15.5 ± 4.0<br>(9.65-24.51)   |
| Cr       | 1.14 ± 0.99<br>(0.00-7.46)      | 1.39 ± 3.31<br>(0-31.95)     | 4.55 ± 17.88<br>(0-115)      | 8.37 ± 19.45<br>(0-133.73)   | 1.90 ± 5.93<br>(0-50.55)     | 1.67 ± 2.17<br>(0-10.88)      | 6.64 ± 9.39<br>(1.03-33.83)  |
| Mn       | 518 ± 199<br>(103-876)          | 524 ± 294<br>(36.3-1103.7)   | 111 ± 74<br>(26-347.5)       | 247 ± 139<br>(89.0-956.8)    | 274 ± 170<br>(62.1-1079)     | 379 ± 419<br>(49.5-3025.4)    | 786 ± 204<br>(460-1119)      |
| Co       | 1.60 ± 1.64<br>(0.04-8.31)      | 2.51 ± 1.94<br>(0.08-8.40)   | 0.93 ± 0.88<br>(0-4.61)      | 0.27 ± 0.35<br>(0-2.51)      | 1.37 ± 1.75<br>(0.16-10.88)  | 1.29 ± 0.93<br>(0.11-4.95)    | 1.10 ± 1.74<br>(0.23-6.24)   |
| Ni       | 0.83 ± 0.72<br>(0-3.50)         | 1.09 ± 0.77<br>(0-3.34)      | 2.03 ± 3.40<br>(0-19.49)     | 1.58 ± 1.07<br>(0-5.80)      | 1.46 ± 2.14<br>(0-14.96)     | 1.31 ± 1.09<br>(0-6.58)       | 1.08 ± 1.40<br>(0.24-5.17)   |
| Cu       | 0.24 ± 0.28<br>(0-1.37)         | 0.23 ± 0.38<br>(0-2.08)      | 0.99 ± 1.72<br>(0-8.68)      | 0.20 ± 0.32<br>(0-1.45)      | 0.77 ± 3.10<br>(0-26.30)     | 1.16 ± 1.01<br>(0-4.58)       | 0.84 ± 0.53<br>(0.29-1.98)   |
| Zn       | 43.2 ± 22.6<br>(4.6-94.6)       | 103.2 ± 49.8<br>(10.2-244.9) | 33.4 ± 45.0<br>(3.6-234)     | 21.9 ± 19.6<br>(8.84-156.21) | 55.3 ± 40.9<br>(6.93-298.4)  | 97.0 ± 67.2<br>(16.32-380.46) | 63.6 ± 15.0<br>(42.11-98.1)  |
| Ga       | 1.06 ± 0.38<br>(0.21-2.34)      | 0.90 ± 0.90<br>(0-5.63)      | 0.57 ± 0.37<br>(0-1.46)      | 1.04 ± 0.36<br>(0.39-1.87)   | 1.37 ± 0.36<br>(0.63-2.60)   | 1.83 ± 0.42<br>(0.29-2.65)    | 2.64 ± 2.33<br>(1.14-9.50)   |
| Rb       | 9.41 ± 12.21<br>(0-102.7)       | 5.98 ± 8.28<br>(0-43.38)     | 0.53 ± 0.38<br>(0-1.46)      | 3.65 ± 2.61<br>(0.35-16.46)  | 1.17 ± 1.33<br>(0-8.84)      | 3.58 ± 3.26<br>(0.07-16.44)   | 4.07 ± 4.39<br>(0.62-15.38)  |
| Sr       | 8.60 ± 3.89<br>(2.5-20.19)      | 13.67 ± 4.74<br>(3.82-23.98) | 13.45 ± 8.63<br>(5.56-42.88) | 14.23 ± 6.27<br>(3.52-27.71) | 22.28 ± 9.21<br>(7.13-50.78) | 7.54 ± 2.46<br>(2.64-16.80)   | 19.66 ± 5.87<br>(7.95-28.37) |
| Y        | 3.16 ± 1.78<br>(0.88-12.33)     | 4.15 ± 5.35<br>(0.35-30.86)  | 0.84 ± 0.61<br>(0-2.11)      | 1.57 ± 2.52<br>(0.22-13.01)  | 4.14 ± 3.22<br>(0.31-18.82)  | 5.44 ± 2.83<br>(0.07-20.09)   | 1.61 ± 2.21<br>(0.48-8.09)   |
| Zr       | 1.27 ± 1.13<br>(0.14-6.91)      | 3.89 ± 8.24<br>(0.07-73.61)  | 2.32 ± 2.68<br>(0.15-11.63)  | 3.97 ± 20.33<br>(0-155.26)   | 1.77 ± 2.26<br>(0-10.48)     | 12.21 ± 14.69<br>(0-70.56)    | 1.18 ± 0.99<br>(0.31-3.49)   |
| Nb       | 0.50 ± 1.00<br>(0.02-6.79)      | 0.54 ± 0.76<br>(0.02-5.40)   | 0.15 ± 0.11<br>(0.02-0.45)   | 0.20 ± 0.18<br>(0-1.10)      | 0.25 ± 0.18<br>(0.03-1.26)   | 2.54 ± 1.59<br>(0.07-7.99)    | 0.34 ± 0.42<br>(0.05-1.53)   |
| Ba       | 4.45 ± 2.35<br>(0.66-16.02)     | 7.71 ± 6.83<br>(1.96-47.95)  | 3.50 ± 1.44<br>(0.22-5.98)   | 5.27 ± 2.94<br>(0.79-15.89)  | 3.58 ± 2.64<br>(0.89-21.77)  | 6.28 ± 2.99<br>(0.11-15.67)   | 2.22 ± 1.10<br>(0.98-5.16)   |
| La       | 0.44 ± 0.66<br>(0.01-3.58)      | 0.82 ± 0.74<br>(0.02-3.02)   | 0.38 ± 0.26<br>(0.04-0.91)   | 0.41 ± 0.48<br>(0.08-3.66)   | 0.60 ± 0.59<br>(0.01-3.44)   | 0.68 ± 0.74<br>(0-5.55)       | 0.74 ± 0.27<br>(0.30-1.40)   |
| Ce       | 0.91 ± 1.26<br>(0-7.01)         | 1.69 ± 1.47<br>(0.06-6.48)   | 0.75 ± 0.51<br>(0.05-2.00)   | 0.92 ± 0.70<br>(0.19-4.96)   | 1.02 ± 0.93<br>(0.09-5.56)   | 1.59 ± 1.63<br>(0-9.64)       | 1.64 ± 0.59<br>(1.17-3.30)   |
| Pr       | 0.12 ± 0.15<br>(0-0.76)         | 0.23 ± 0.20<br>(0-0.85)      | 0.09 ± 0.07<br>(0-0.31)      | 0.11 ± 0.09<br>(0.02-0.51)   | 0.15 ± 0.14<br>(0.01-0.92)   | 0.22 ± 0.16<br>(0.01-1.11)    | 0.20 ± 0.11<br>(0.11-0.49)   |

|    |                             |                             |                            |                            |                            |                              |                            |
|----|-----------------------------|-----------------------------|----------------------------|----------------------------|----------------------------|------------------------------|----------------------------|
| Nd | 0.56 ± 0.58<br>(0-3.33)     | 0.97 ± 0.76<br>(0-2.97)     | 0.43 ± 0.33<br>(0-1.34)    | 0.55 ± 0.50<br>(0-2.37)    | 0.72 ± 0.65<br>(0.06-3.99) | 0.94 ± 0.57<br>(0-4.04)      | 0.77 ± 0.41<br>(0.49-1.95) |
| Sm | 0.18 ± 0.19<br>(0-1.17)     | 0.27 ± 0.25<br>(0-1.31)     | 0.09 ± 0.09<br>(0-0.33)    | 0.13 ± 0.14<br>(0-0.63)    | 0.19 ± 0.17<br>(0.02-0.79) | 0.30 ± 0.14<br>(0.02-0.86)   | 0.17 ± 0.13<br>(0-0.47)    |
| Eu | 0.02 ± 0.02<br>(0-0.12)     | 0.03 ± 0.03<br>(0-0.18)     | 0.02 ± 0.02<br>(0-0.1)     | 0.02 ± 0.03<br>(0-0.19)    | 0.02 ± 0.02<br>(0-0.09)    | 0.03 ± 0.02<br>(0-0.08)      | 0.04 ± 0.06<br>(0-0.20)    |
| Gd | 0.24 ± 0.20<br>(0-0.98)     | 0.31 ± 0.31<br>(0-1.72)     | 0.14 ± 0.17<br>(0-0.62)    | 0.18 ± 0.19<br>(0-0.95)    | 0.28 ± 0.21<br>(0.02-1.07) | 0.41 ± 0.17<br>(0.03-1.02)   | 0.18 ± 0.14<br>(0.04-0.50) |
| Tb | 0.05 ± 0.03<br>(0.002-0.16) | 0.06 ± 0.06<br>(0-0.40)     | 0.02 ± 0.02<br>(0-0.08)    | 0.03 ± 0.04<br>(0-0.19)    | 0.05 ± 0.04<br>(0-0.21)    | 0.08 ± 0.03<br>(0-0.20)      | 0.02 ± 0.03<br>(0-0.10)    |
| Dy | 0.32 ± 0.19<br>(0.07-1.01)  | 0.42 ± 0.47<br>(0.03-2.59)  | 0.11 ± 0.12<br>(0-0.5)     | 0.19 ± 0.31<br>(0-1.75)    | 0.37 ± 0.30<br>(0.01-1.87) | 0.64 ± 0.30<br>(0.01-2.13)   | 0.25 ± 0.24<br>(0.05-0.91) |
| Ho | 0.07 ± 0.05<br>(0.002-0.28) | 0.11 ± 0.14<br>(0-0.84)     | 0.02 ± 0.02<br>(0-0.09)    | 0.04 ± 0.07<br>(0-0.38)    | 0.09 ± 0.07<br>(0-0.38)    | 0.15 ± 0.08<br>(0-0.56)      | 0.05 ± 0.06<br>(0-0.22)    |
| Er | 0.24 ± 0.16<br>(0.04-1.08)  | 0.34 ± 0.46<br>(0.02-2.81)  | 0.08 ± 0.08<br>± 0.01      | 0.17 ± 0.37<br>(0-2.28)    | 0.31 ± 0.24<br>(0-1.19)    | 0.52 ± 0.29<br>(0.01-2.00)   | 0.15 ± 0.19<br>(0-0.70)    |
| Tm | 0.04 ± 0.04<br>(0-0.26)     | 0.05 ± 0.08<br>(0-0.67)     | ± 0.01<br>(0-0.06)         | 0.03 ± 0.07<br>(0-0.44)    | 0.05 ± 0.04<br>(0-0.17)    | 0.08 ± 0.05<br>(0-0.38)      | 0.02 ± 0.03<br>(0-0.11)    |
| Yb | 0.23 ± 0.26<br>(0-1.81)     | 0.37 ± 0.78<br>(0-5.63)     | 0.08 ± 0.07<br>(0-0.3)     | 0.22 ± 0.76<br>(0-5.49)    | 0.28 ± 0.25<br>(0-1.15)    | 0.58 ± 0.43<br>(0-3.15)      | 0.12 ± 0.14<br>(0-0.48)    |
| Lu | 0.04 ± 0.05<br>(0-0.35)     | 0.06 ± 0.15<br>(0-1.35)     | ± 0.01<br>(0-0.05)         | 0.04 ± 0.17<br>(0-1.26)    | 0.04 ± 0.04<br>(0-0.18)    | 0.08 ± 0.06<br>(0-0.45)      | ± 0.01<br>(0-0.05)         |
| Hf | ± 0.03<br>(0-0.15)          | 0.11 ± 0.28<br>(0-2.12)     | 0.06 ± 0.09<br>(0-0.42)    | 0.07 ± 0.30<br>(0-2.22)    | 0.06 ± 0.09<br>(0-0.55)    | 0.36 ± 0.45<br>(0-2.11)      | 0.03 ± 0.03<br>(0-0.09)    |
| Ta | ± 0.07<br>(0-0.53)          | 0.02 ± 0.03<br>(0-0.19)     | 0.00 ± 0.00<br>(0-0.02)    | 0.01 ± 0.03<br>(0-0.20)    | 0.02 ± 0.02<br>(0-0.17)    | 0.05 ± 0.06<br>(0-0.32)      | 0.02 ± 0.04<br>(0-0.14)    |
| W  | 0.35 ± 0.40<br>(0.02-2.3)   | 0.63 ± 0.51<br>(0.02-2.93)  | 0.18 ± 0.16<br>(0.00-0.63) | 0.22 ± 0.16<br>(0-0.68)    | 0.24 ± 1.03<br>(0-10.25)   | 1.04 ± 1.02<br>(0.23-6.36)   | 0.03 ± 0.03<br>(0-0.10)    |
| Pb | 0.90 ± 0.50<br>(0.26-2.93)  | 1.05 ± 1.75<br>(0.15-16.65) | 0.58 ± 0.31<br>(0-1.58)    | 2.44 ± 1.06<br>(0.62-5.63) | 1.66 ± 1.18<br>(0.44-8.35) | 6.29 ± 12.64<br>(0.72-77.18) | 2.02 ± 1.00<br>(1.19-4.42) |
| Th | 0.08 ± 0.08<br>(0-0.51)     | 0.24 ± 0.32<br>(0-2.14)     | 0.22 ± 0.27<br>(0-1.05)    | 0.02 ± 0.05<br>(0-0.28)    | 0.13 ± 0.19<br>(0-1.33)    | 1.32 ± 1.45<br>(0-5.75)      | 0.15 ± 0.11<br>(0-0.43)    |
| U  | 0.73 ± 0.59<br>(0.1-2.55)   | 0.60 ± 0.55<br>(0.03-2.38)  | 0.64 ± 0.24<br>(0.18-1.22) | 0.11 ± 0.18<br>(0-1.22)    | 0.82 ± 1.06<br>(0.02-6.52) | 0.98 ± 0.48<br>(0.01-2.34)   | 0.39 ± 0.17<br>(0.04-0.62) |
